# Supplementary material for: Office-Based Structural Autologous Fat Injection Laryngoplasty for Unilateral Vocal Fold Paralysis
Source: MDPI journal article supplement (doi:10.3390/jcm11164806), 2022-08-17
Supplement: s1 [file s1]

## **Supplemental material**

### **Video S1. Office-based structural autologous fat injection laryngoplasty**

The current video clip demonstrates an example of office-based structural AFIL. Note the multiple injection point manner distributes purified fat tissue, tailored under real time endoscopic feedback.
